# Supplementary material for: Development of Pelubiprofen Tromethamine with Improved Gastrointestinal Safety and Absorption
Source: MDPI journal article supplement (doi:10.3390/pharmaceutics13050745), 2021-05-18

# Supplementary Materials: Development of Novel Pelubiprofen Tromethamine Salt with Improved Gastrointestinal Safety and Absorption to the Commercial Pelubiprofen

Ji Yeon Park, Dong Ho Oh, Sang-Wook Park, Bo Ram Chae, Chul Woo Kim, Sang Heon Han, Heon Jong Sin, Soo Bin Yeom, Da Yeong Lee, Min Kyu Park, Jun-Bom Park, Kyung-Tae Lee

**Table S1.**  $^1\text{H}$  NMR ( $\text{DMSO}-d_6$  at 400 MHz) chemical shifts ( $\delta$ ) and assignments of the PEL-T.

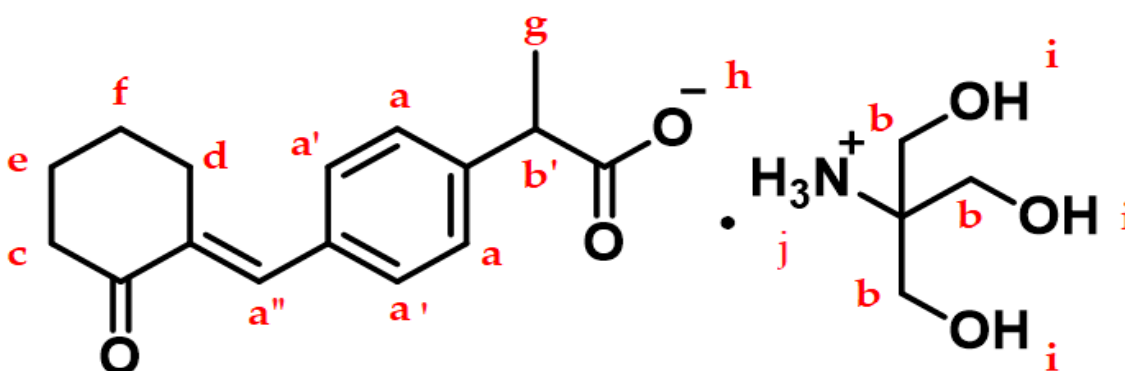

| Assignments | Chemical Shifts | No. of Hydrogen |
|-------------|-----------------|-----------------|
| a, a', a''  | 7.30–7.34       | 5               |
| i, j        | 5.33            | 6               |
| b'          | 3.44–3.46       | 1               |
| b           | 3.37            | 6               |
| c           | 2.77            | 2               |
| d           | 2.40–2.48       | 2               |
| e           | 1.82            | 2               |
| f           | 1.67            | 2               |
| g           | 1.28–1.30       | 3               |

**Table S2.**  $^{13}\text{C}$  NMR (DMSO- $d_6$  at 400 MHz) chemical shifts ( $\delta$ ) and assignments of the PEL-T.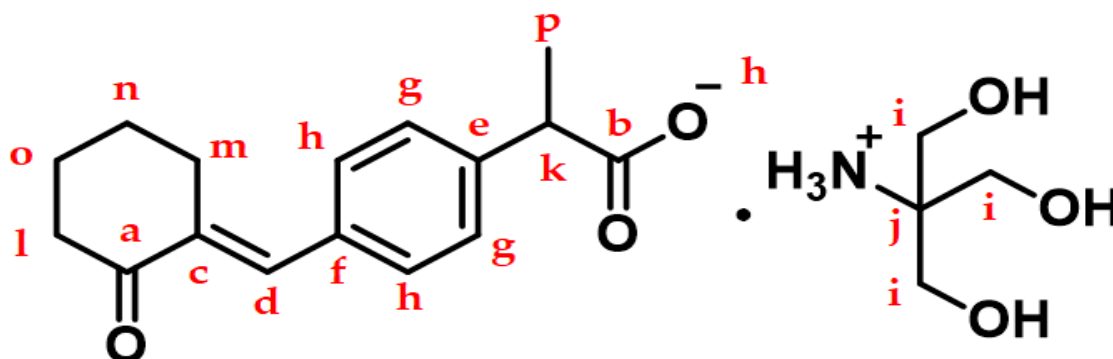

| Assignments | Chemical shifts | No. of carbons |
|-------------|-----------------|----------------|
| a           | 200.62          | 1              |
| b           | 177.62          | 1              |
| c           | 145.39          | 1              |
| d           | 136.39          | 1              |
| e           | 134.81          | 1              |
| f           | 133.15          | 1              |
| g           | 130.52          | 2              |
| h           | 128.13          | 2              |
| i           | 61.00           | 3              |
| j           | 60.21           | 1              |
| k           | 47.73           | 1              |
| l           | 40.42           | 1              |
| m           | 28.89           | 1              |
| n           | 23.71           | 1              |
| o           | 23.13           | 1              |
| p           | 19.83           | 1              |

**Table S3.** Stress stability (contents).

| Storage<br>Conditions | Time<br>(days) | Contents (%) <sup>a</sup> |            |
|-----------------------|----------------|---------------------------|------------|
|                       |                | PEL                       | PEL-T      |
| 80 ± 5 °C             | 0              | 98.6 ± 0.8                | 98.4 ± 0.1 |
|                       | 14             | 98.2 ± 0.6                | 98.1 ± 0.1 |
|                       | 21             | 97.1 ± 0.9                | 98.2 ± 0.2 |
| RH 90 ± 5%            | 0              | 98.6 ± 0.8                | 98.4 ± 0.1 |
|                       | 14             | 98.9 ± 0.4                | 98.6 ± 0.2 |
|                       | 21             | 98.5 ± 0.4                | 98.3 ± 0.2 |

Each value represents the mean ± S.D. ( $n = 3$ ).; <sup>a</sup> Acceptance criteria was set for PEL contents of 95%–105%.; PEL, pelubiprofen; PEL-T, pelubiprofen tromethamine; RH, relative humidity

**Table S4.** Stress stability (degradation products).

| Storage conditions | Time (days) | Degradation Products (%) <sup>a</sup> |             |             |             |
|--------------------|-------------|---------------------------------------|-------------|-------------|-------------|
|                    |             | Impurity A                            |             | Total peaks |             |
|                    |             | PEL                                   | PEL-T       | PEL         | PEL-T       |
| 80 ± 5 °C          | 0           | 0.19 ± 0.03                           | 0.15 ± 0.02 | 0.24 ± 0.03 | 0.24 ± 0.03 |
|                    | 14          | 0.22 ± 0.03                           | 0.16 ± 0.02 | 0.31 ± 0.03 | 0.24 ± 0.01 |
|                    | 21          | 0.21 ± 0.02                           | 0.13 ± 0.03 | 0.87 ± 0.05 | 0.35 ± 0.04 |
| RH 90 ± 5%         | 0           | 0.19 ± 0.03                           | 0.15 ± 0.02 | 0.24 ± 0.03 | 0.24 ± 0.03 |
|                    | 14          | 0.20 ± 0.03                           | 0.15 ± 0.03 | 0.26 ± 0.01 | 0.24 ± 0.01 |
|                    | 21          | 0.16 ± 0.02                           | 0.12 ± 0.02 | 0.33 ± 0.02 | 0.45 ± 0.06 |

Each value represents the mean ± S.D. ( $n = 3$ ). <sup>a</sup>Acceptance criteria was set for degradation products of less than 0.5% for the impurity A and 1.0% for the total peaks in the relative peak area.

**Figure S1.**  $^1\text{H}$  NMR spectra (methanol- $d_4$  at 500 MHz) of (a) PEL and (b) PEL-T.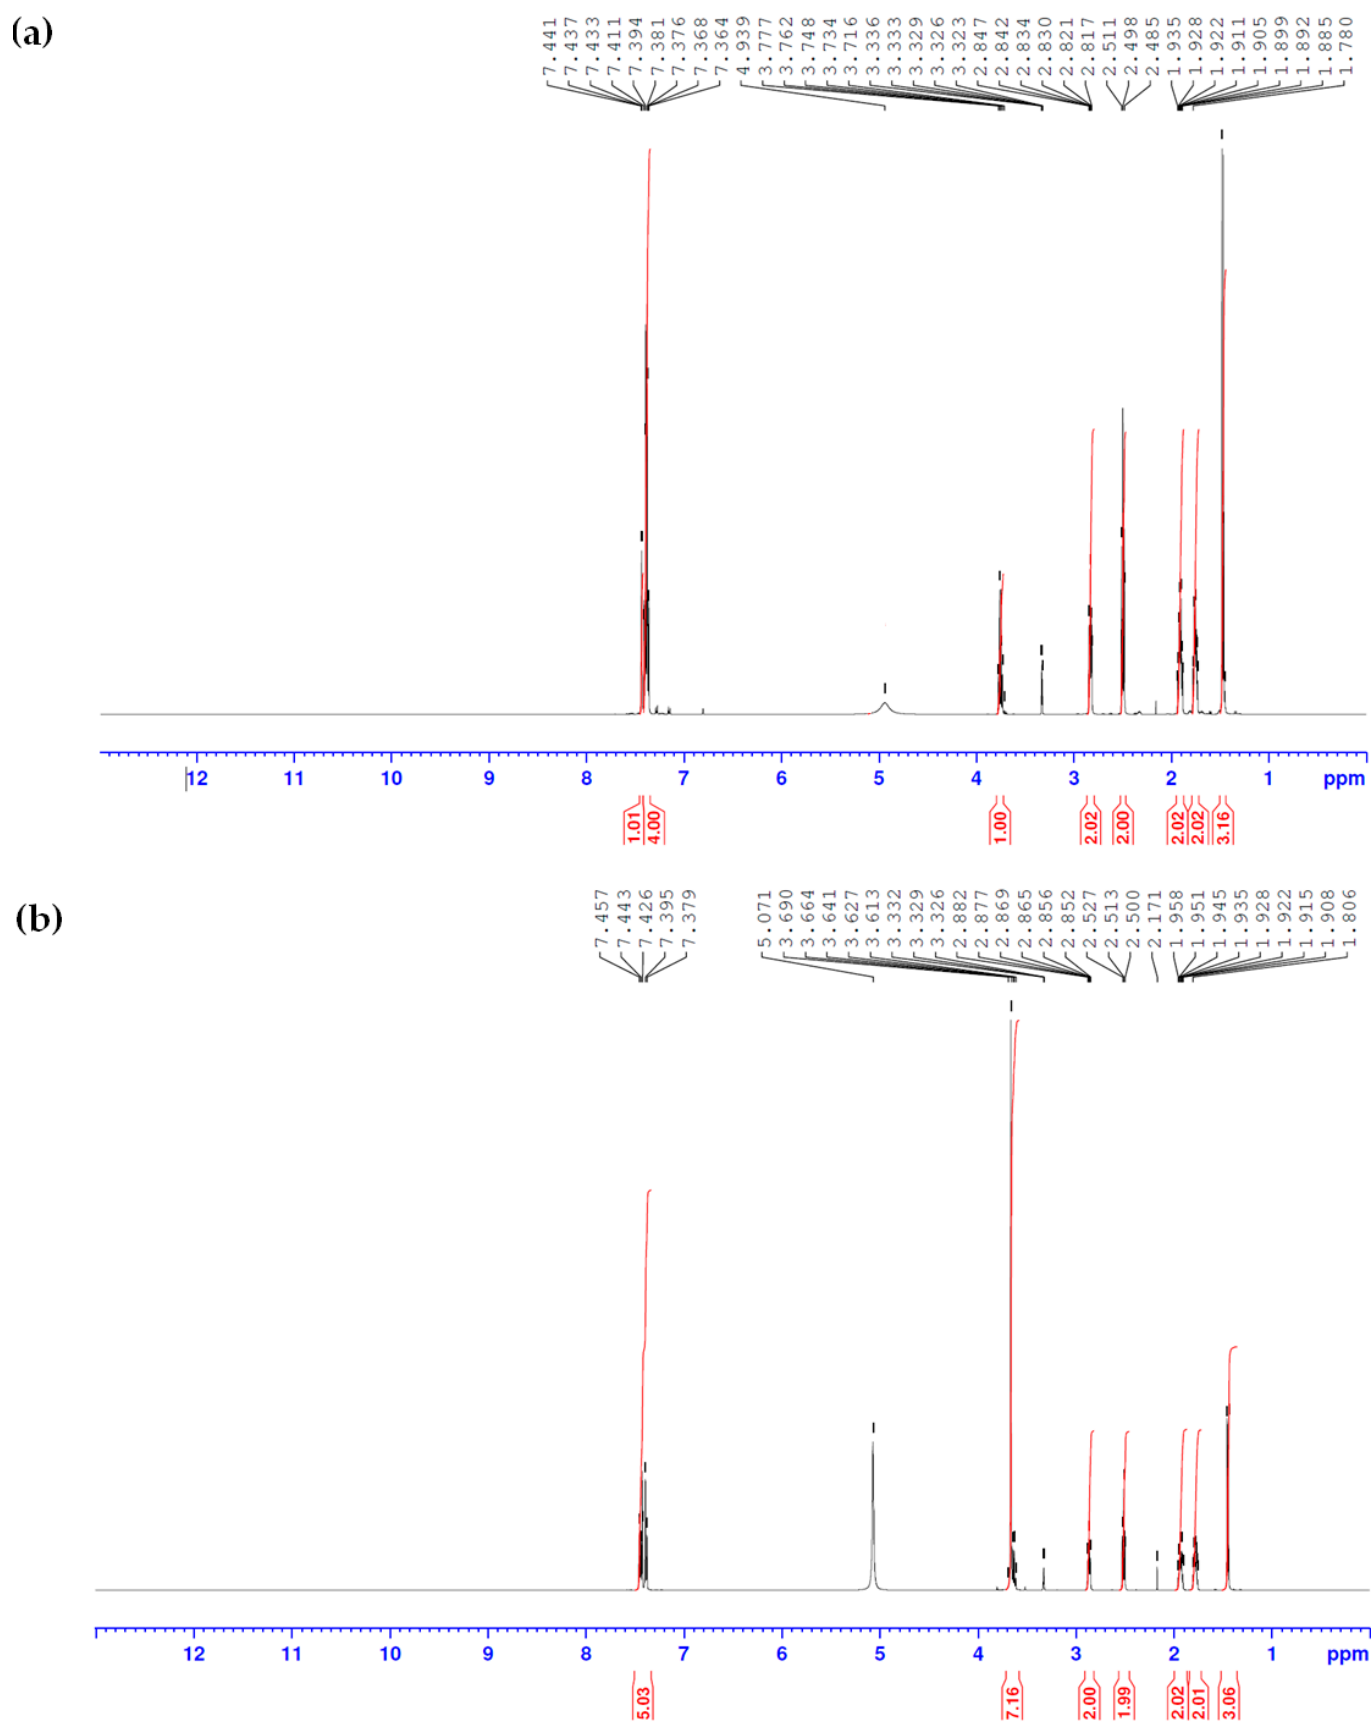

Figure S2. (a)  $^1\text{H}$  NMR spectra ( $\text{DMSO}-d_6$  at 400 MHz) and (b)  $^{13}\text{C}$  NMR spectra ( $\text{DMSO}-d_6$  at 400 MHz) of PEL-T.

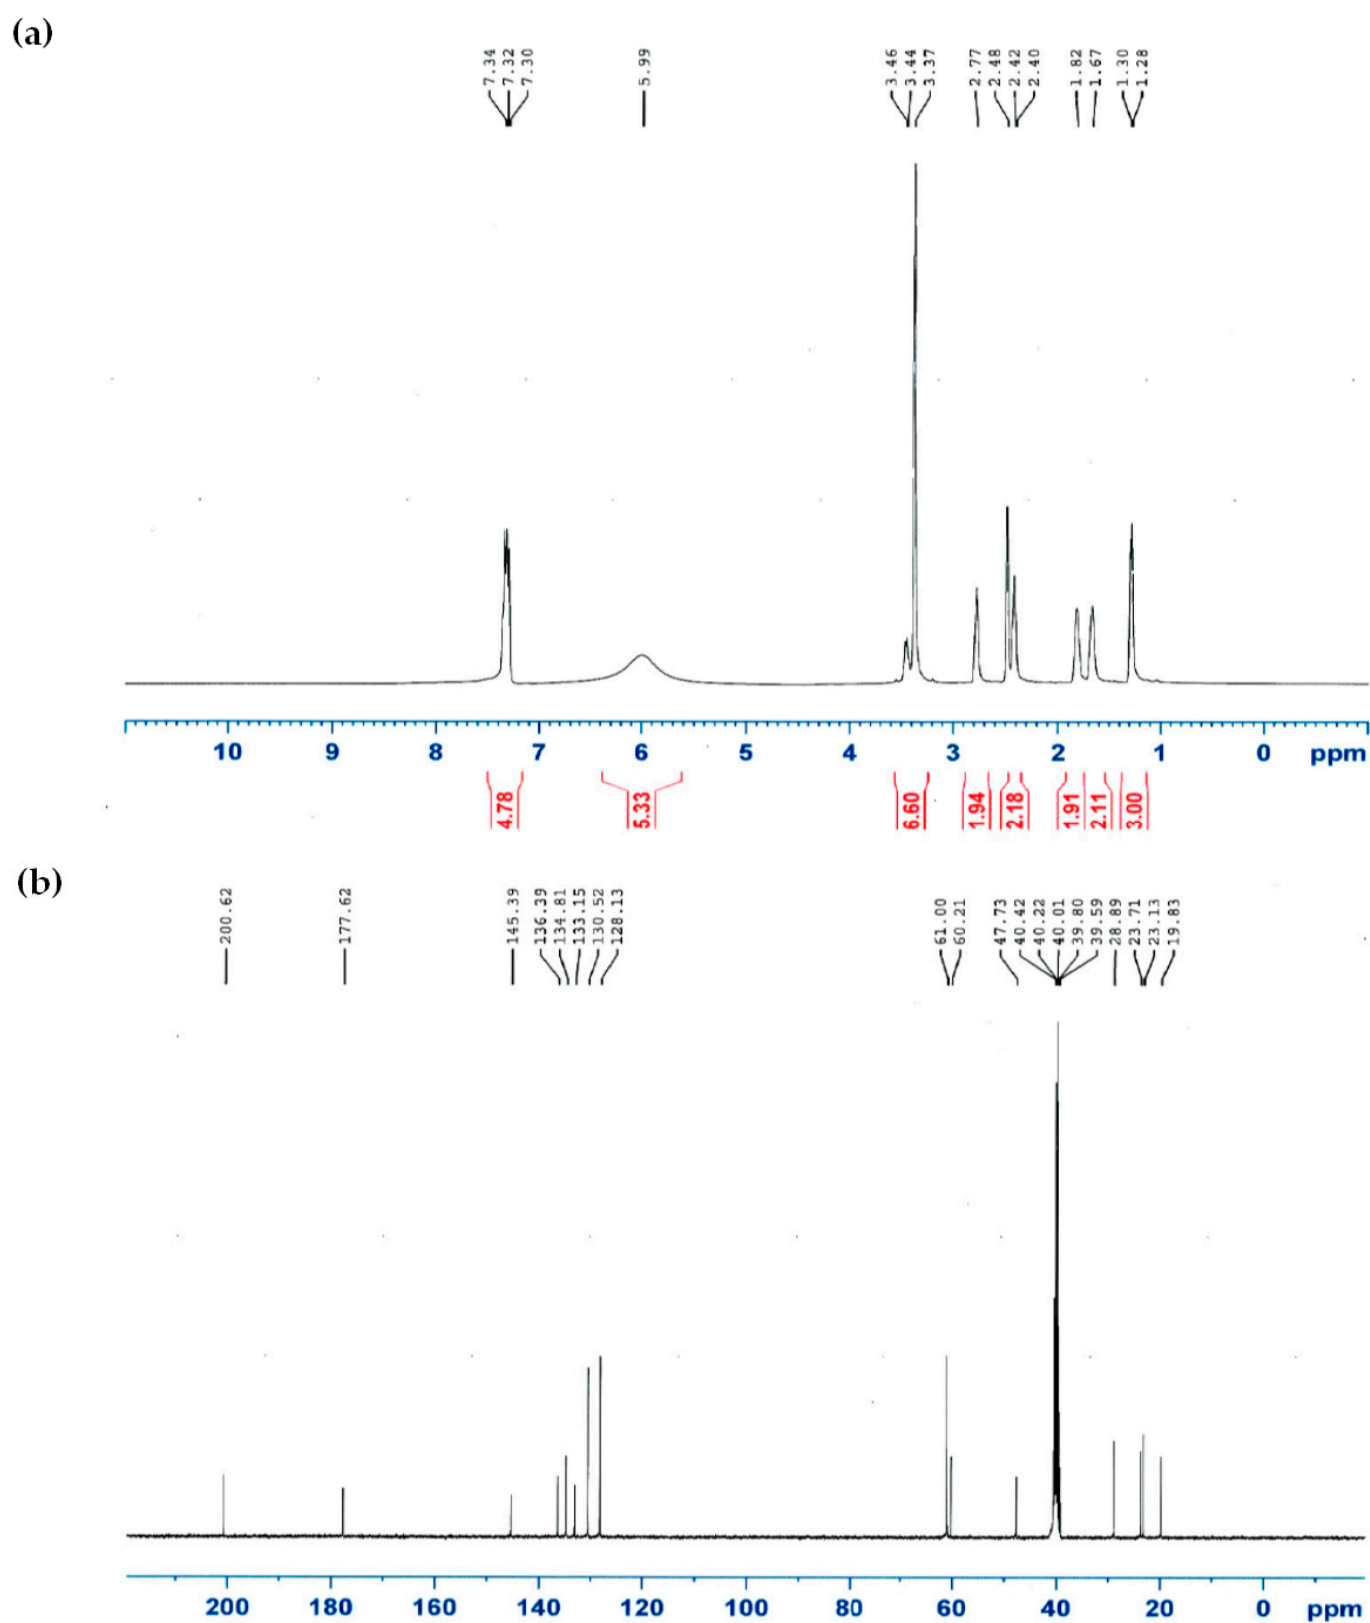

Supplement: s1 [file s1]
